# Supplementary material for: Colloidal-like aggregation of a functional amyloid protein
Source: Royal Society of Chemistry journal article supplement (doi:10.1039/d0cp03265d), 2020-01-01
Supplement: d0cp03265d1.pdf [file d0cp03265d1.pdf]

## Colloidal - like aggregation of a functional amyloid protein

David N. Azulay<sup>a</sup>, Mnar Ghrayeb<sup>a</sup>, Ilanit Bensimhon Ktorza<sup>a</sup>, Ido Nir<sup>b</sup>, Rinad Nasser<sup>a</sup>, Yair S Harel<sup>a,c</sup> and Liraz Chai<sup>a\*</sup>

<sup>a</sup> *Institute of Chemistry, the Hebrew University of Jerusalem and The center for Nanoscience and Nanotechnology, Edmond J. Safra Campus, Jerusalem 91904, Israel*

<sup>b</sup> *The Israel Institute for Biological Research*

<sup>c</sup> currently at the Weizmann Institute of Science

*\* To whom correspondence should be addressed: Dr. Liraz Chai, Institute of Chemistry, The Hebrew University of Jerusalem, Edmond J. Safra campus, Jerusalem 91904, Israel. Telephone: +972-2-6585303, Fax. +972-2-5660425. Email. [Liraz.chai@mail.huji.ac.il](mailto:Liraz.chai@mail.huji.ac.il)*

| pH   | Web page charge of the monomer (e <sup>-</sup> ) | Charge in Coulombs of the monomer | Charge in Coulombs of the oligomer | charge density (C/m <sup>2</sup> ) | $\Psi_0$ (V) | $\Psi_0$ (mV) | $\gamma$ | $\Psi_x$ (mV), $x=1.67$ nm |
|------|--------------------------------------------------|-----------------------------------|------------------------------------|------------------------------------|--------------|---------------|----------|----------------------------|
| 1    | 33.8                                             | 5.41E-18                          | 1.62E-16                           | 8.27E-02                           | 9.59E-02     | 95.93292      | 0.732581 | 22.66308                   |
| 1.5  | 33.8                                             | 5.41E-18                          | 1.62E-16                           | 8.27E-02                           | 9.59E-02     | 95.93292      | 0.732581 | 22.66308                   |
| 2    | 33.8                                             | 5.41E-18                          | 1.62E-16                           | 8.27E-02                           | 9.59E-02     | 95.93292      | 0.732581 | 22.66308                   |
| 2.5  | 33.3                                             | 5.33E-18                          | 1.60E-16                           | 8.15E-02                           | 9.52E-02     | 95.20388      | 0.729274 | 22.55745                   |
| 3    | 32.1                                             | 5.14E-18                          | 1.54E-16                           | 7.86E-02                           | 9.34E-02     | 93.41289      | 0.721004 | 22.29348                   |
| 3.5  | 29.1                                             | 4.66E-18                          | 1.40E-16                           | 7.12E-02                           | 8.87E-02     | 88.65818      | 0.69802  | 21.56135                   |
| 4    | 22.6                                             | 3.62E-18                          | 1.09E-16                           | 5.53E-02                           | 7.67E-02     | 76.68602      | 0.633256 | 19.50976                   |
| 4.5  | 12.4                                             | 1.99E-18                          | 5.96E-17                           | 3.04E-02                           | 5.08E-02     | 50.83733      | 0.458252 | 14.03746                   |
| 5    | 3.4                                              | 5.45E-19                          | 1.63E-17                           | 8.32E-03                           | 1.61E-02     | 16.06786      | 0.155217 | 4.728656                   |
| 5.5  | -1.5                                             | -2.40E-19                         | -7.21E-18                          | -3.67E-03                          | -7.18E-03    | -7.18161      | -0.06983 | -2.12605                   |
| 6    | -3.6                                             | -5.77E-19                         | -1.73E-17                          | -8.81E-03                          | -1.70E-02    | -16.9808      | -0.16388 | -4.99303                   |
| 6.5  | -4.8                                             | -7.69E-19                         | -2.31E-17                          | -1.17E-02                          | -2.23E-02    | -22.3441      | -0.21423 | -6.53078                   |
| 7    | -5.6                                             | -8.97E-19                         | -2.69E-17                          | -1.37E-02                          | -2.58E-02    | -25.7993      | -0.2461  | -7.50535                   |
| 7.5  | -6.1                                             | -9.77E-19                         | -2.93E-17                          | -1.49E-02                          | -2.79E-02    | -27.906       | -0.26527 | -8.09247                   |
| 8    | -6.8                                             | -1.09E-18                         | -3.27E-17                          | -1.66E-02                          | -3.08E-02    | -30.7847      | -0.29114 | -8.88524                   |
| 8.5  | -7.9                                             | -1.27E-18                         | -3.80E-17                          | -1.93E-02                          | -3.51E-02    | -35.1384      | -0.32945 | -10.0615                   |
| 9    | -10.3                                            | -1.65E-18                         | -4.95E-17                          | -2.52E-02                          | -4.39E-02    | -43.9188      | -0.40341 | -12.3402                   |
| 9.5  | -15.9                                            | -2.55E-18                         | -7.64E-17                          | -3.89E-02                          | -6.10E-02    | -60.9854      | -0.53271 | -16.3544                   |
| 10   | -25.5                                            | -4.09E-18                         | -1.23E-16                          | -6.24E-02                          | -8.23E-02    | -82.3476      | -0.66514 | -20.5177                   |
| 10.5 | -35.1                                            | -5.62E-18                         | -1.69E-16                          | -8.59E-02                          | -9.78E-02    | -97.7835      | -0.74082 | -22.9265                   |
| 11   | -40.6                                            | -6.50E-18                         | -1.95E-16                          | -9.94E-02                          | -1.05E-01    | -104.973      | -0.77081 | -23.8877                   |
| 11.2 | -41.9                                            | -6.71E-18                         | -2.01E-16                          | -1.03E-01                          | -1.07E-01    | -106.54       | -0.77693 | -24.0844                   |
| 11.5 | -42.9                                            | -6.87E-18                         | -2.06E-16                          | -1.05E-01                          | -1.08E-01    | -107.714      | -0.78142 | -24.2288                   |
| 12   | -43.9                                            | -7.03E-18                         | -2.11E-16                          | -1.07E-01                          | -1.09E-01    | -108.863      | -0.78574 | -24.3678                   |
| 12.5 | -44                                              | -7.05E-18                         | -2.11E-16                          | -1.08E-01                          | -1.09E-01    | -108.976      | -0.78616 | -24.3814                   |
| 13   | -44                                              | -7.05E-18                         | -2.11E-16                          | -1.08E-01                          | -1.09E-01    | -108.976      | -0.78616 | -24.3814                   |

Table S1. Print-out of the calculated zeta potential ( $\Psi_x$ ) of a TasA oligomer in the pH range 1-13, at a distance  $x= 1.67$  nm away from the surface.

| pH   | charge in Coulombs | charge density (C/m <sup>2</sup> ) | $\Psi_0$ (V) | $\Psi_0$ (mV) | $\gamma$ | $\Psi_x$ (V), x= 1.67 nm |
|------|--------------------|------------------------------------|--------------|---------------|----------|--------------------------|
| 1    | 4.33E-12           | 0.019515                           | 0.035419     | 35.41871      | 0.331878 | 10.13622                 |
| 1.5  | 4.33E-12           | 0.019515                           | 0.035419     | 35.41871      | 0.331878 | 10.13622                 |
| 2    | 4.33E-12           | 0.019515                           | 0.035419     | 35.41871      | 0.331878 | 10.13622                 |
| 2.5  | 4.26E-12           | 0.019226                           | 0.034963     | 34.96342      | 0.327926 | 10.01476                 |
| 3    | 4.11E-12           | 0.018533                           | 0.033861     | 33.8609       | 0.31831  | 9.719309                 |
| 3.5  | 3.72E-12           | 0.016801                           | 0.031044     | 31.04402      | 0.293446 | 8.956075                 |
| 4    | 2.89E-12           | 0.013048                           | 0.024648     | 24.64823      | 0.235538 | 7.182233                 |
| 4.5  | 1.59E-12           | 0.007159                           | 0.01388      | 13.87965      | 0.134354 | 4.092344                 |
| 5    | 4.35E-13           | 0.001963                           | 0.003849     | 3.848633      | 0.037464 | 1.140561                 |
| 5.5  | -1.92E-13          | -0.00087                           | -0.0017      | -1.69921      | -0.01655 | -0.50374                 |
| 6    | -4.61E-13          | -0.00208                           | -0.00407     | -4.07456      | -0.03966 | -1.20745                 |
| 6.5  | -6.14E-13          | -0.00277                           | -0.00543     | -5.42833      | -0.05282 | -1.60803                 |
| 7    | -7.17E-13          | -0.00323                           | -0.00633     | -6.32882      | -0.06156 | -1.87421                 |
| 7.5  | -7.81E-13          | -0.00352                           | -0.00689     | -6.89066      | -0.06701 | -2.04016                 |
| 8    | -8.7E-13           | -0.00393                           | -0.00768     | -7.67585      | -0.07461 | -2.27189                 |
| 8.5  | -1.01E-12          | -0.00456                           | -0.00891     | -8.90606      | -0.08652 | -2.63446                 |
| 9    | -1.32E-12          | -0.00595                           | -0.01157     | -11.5718      | -0.11222 | -3.41763                 |
| 9.5  | -2.03E-12          | -0.00918                           | -0.01766     | -17.6643      | -0.17035 | -5.19049                 |
| 10   | -3.26E-12          | -0.01472                           | -0.02755     | -27.5504      | -0.26205 | -7.99376                 |
| 10.5 | -4.49E-12          | -0.02027                           | -0.03659     | -36.5912      | -0.342   | -10.4475                 |
| 11   | -5.2E-12           | -0.02344                           | -0.04137     | -41.3743      | -0.38246 | -11.6936                 |
| 11.2 | -5.36E-12          | -0.02419                           | -0.04246     | -42.4635      | -0.39148 | -11.9718                 |
| 11.5 | -5.49E-12          | -0.02477                           | -0.04329     | -43.2908      | -0.39828 | -12.1817                 |
| 12   | -5.62E-12          | -0.02535                           | -0.04411     | -44.109       | -0.40496 | -12.3881                 |
| 12.5 | -5.63E-12          | -0.0254                            | -0.04419     | -44.1904      | -0.40562 | -12.4086                 |
| 13   | -5.63E-12          | -0.0254                            | -0.04419     | -44.1904      | -0.40562 | -12.4086                 |

Table S2. Print-out of the calculated zeta potential ( $\Psi_x$ ) of a **TasA aggregate** in the pH range 1-13, at a distance x= 1.67 nm away from the surface.

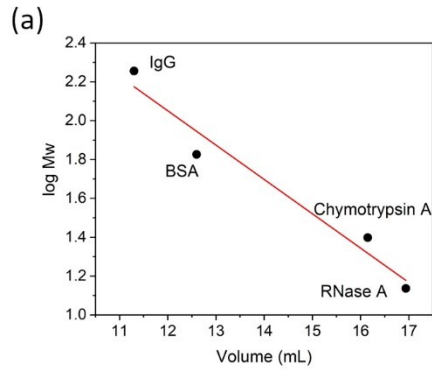

(b)

| Protein   | Mw   | Volume |
|-----------|------|--------|
| IgG       | 180  | 11.3   |
| BSA       | 67   | 12.6   |
| Chymotr.A | 25   | 16.15  |
| RNaseA    | 13.7 | 16.94  |

Figure S1. Calibration curve for the gel filtration analytical column, superpose 12, describing the relation between the logarithm of the molecular weight (in kDa) and the elution volume of the proteins specified on the graph (a). The red line is a linear best fit to the data, according to  $y = ax + b$ , with a (slope) =  $0.18 \pm 0.02$  and b (y intercept) =  $4.2 \pm 0.4$  (a). The table in (b) shows the detailed molecular weights (in kDa) and elution volumes that we were measured and plotted in (a).

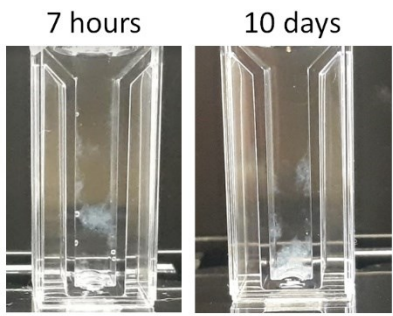

Figure S2. TasA aggregates settling down in the cuvette at longer times than those recorded with the turbidity tests (Fig. 2 (a)). The images show that the aggregates continue to settle (here shown at 7 hours and 10 days following the change of the pH to 2.5) till they reach the bottom of the cuvette.

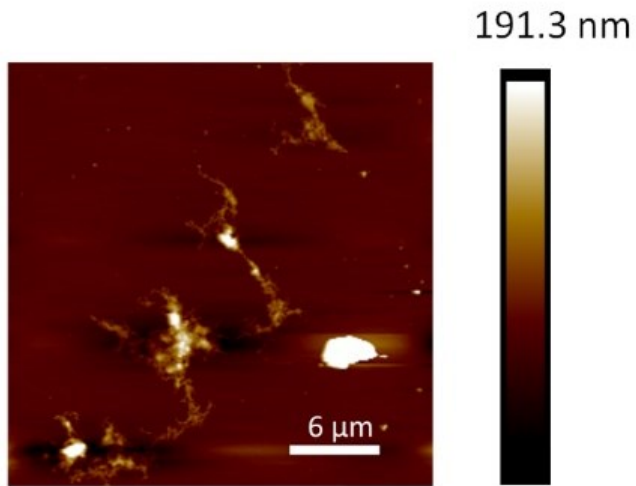

Figure S3. An AFM topography view of multiple TasA aggregates formed after the acidification of the solution.

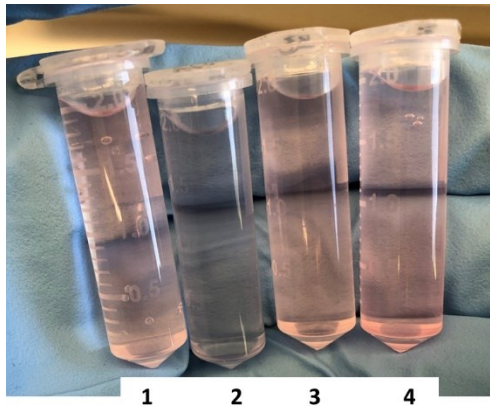

Figure S4. Gold Nanoparticles before and after pH reduction to 2.5. Epi tubes 1, 2 show citrate - stabilized NPs, before (1) and after (2) solution acidification. Epi tubes 3,4 show PEG-carboxylate - stabilized NPs before (3) and after (4) solution acidification. The citrate - stabilized NPs aggregated, while the PEG-carboxylate NPs remained stable in solution after changing the solution pH to 2.5.

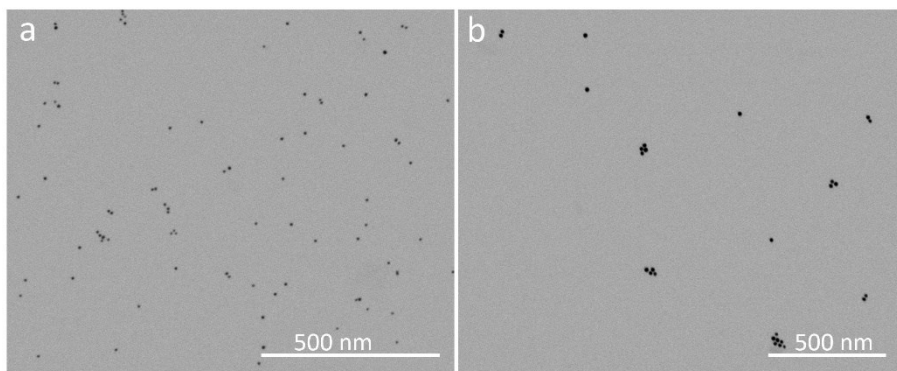

Figure S5. SEM images of Gold NPs, mixed with TasA, at pH = 8. (a) shows citrate-stabilized gold NPs and (b) shows PEG-carboxylate-stabilized gold NPs.



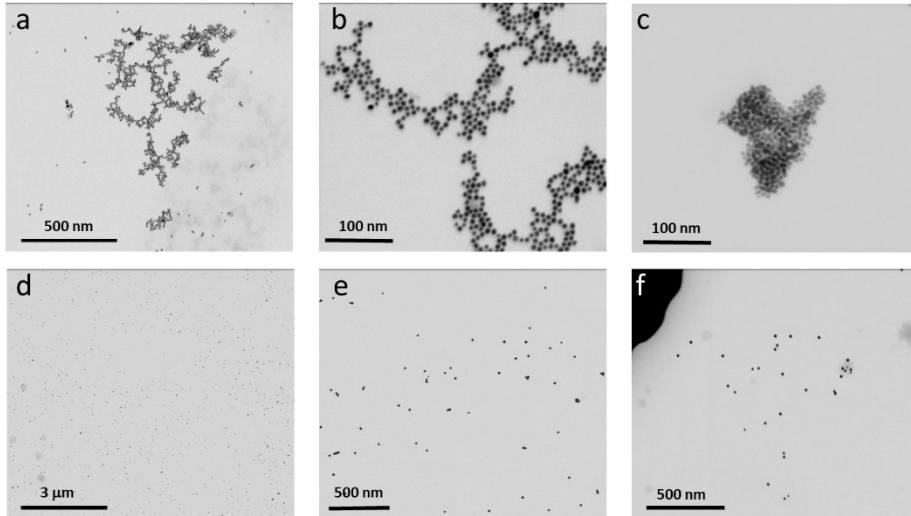

Figure S6. TEM images of gold NPs. Citrate - stabilized NPs (citrate buffer, pH =7) (a,b), (b) is a zoomed-in view of image (a). The NPs aggregates at pH 2.5 are shown in (c). PEG-Carboxylate - stabilized NPs in TDW (d, e), (e) is a zoomed-in view of image (d), and at pH 2.5 (f). Citrate - stabilized NPs aggregate at pH 2.5, while PEG-carboxylate - stabilized NPs remained stable in solution. We attribute the aggregation of citrate-stabilized NPs in water at pH =7 (a,b) to their interaction with the surface and drying effects<sup>1</sup>.

## References

1. B. Michen, C. Geers, D. Vanhecke, C. Endes, B. Rothen-Rutishauser, S. Balog and A. Petri-Fink, *Sci Rep*, 2015, **5**, 9793.
